# Supplementary material
Source: PubMed Central journal article supplement (PMC7187587)
Supplement: AAC.01587-19-s0001.pdf [file AAC.01587-19-s0001.pdf]

## Supplementary Information

### Metabolomics study of the synergistic killing of polymyxin B in combination with amikacin against polymyxin-susceptible and -resistant *Pseudomonas aeruginosa*

Maytham Hussein<sup>1,2</sup>, Mei-Ling Han<sup>1</sup>, Yan Zhu<sup>1</sup>, Qi (Tony) Zhou<sup>3</sup>, Yu-Wei Lin<sup>1</sup>, Robert. E.W. Hancock<sup>4</sup>, Daniel Hoyer,<sup>2,5,6</sup> Darren J Creek<sup>7</sup>, Jian Li<sup>1\*</sup>, Tony Velkov<sup>2\*</sup>

<sup>1</sup>Monash Biomedicine Discovery Institute, Department of Microbiology, School of Biomedical Sciences, Faculty of Medicine, Nursing and Health Sciences, Monash University, Melbourne, Australia; <sup>2</sup>Department of Pharmacology & Therapeutics, School of Biomedical Sciences, Faculty of Medicine, Dentistry and Health Sciences, The University of Melbourne, Parkville, VIC, 3010, Australia; <sup>3</sup>Department of Industrial and Physical Pharmacy, College of Pharmacy, Purdue University, West Lafayette, IN 47907, USA. <sup>4</sup>Department of Microbiology and Immunology, Centre for Microbial Diseases and Immunity Research, University of British Columbia, Vancouver, British Columbia, Canada; <sup>5</sup>The Florey Institute of Neuroscience and Mental Health, The University of Melbourne, 30 Royal Parade, Parkville, VIC, 3052, Australia; <sup>6</sup>Department of Molecular Medicine, The Scripps Research Institute, 10550 N. Torrey Pines Road, La Jolla, CA 92037, USA; <sup>7</sup>Drug Delivery, Disposition and Dynamics, Monash Institute of Pharmaceutical Sciences, Monash University, Melbourne 3052, Australia.

†**Correspondence:** Tony Velkov, Phone: + 61 3 83449846. Fax: +61 3 9903 9583. E-mail:

[Tony.Velkov@unimelb.edu.au](mailto:Tony.Velkov@unimelb.edu.au) OR [Jian.Li@monash.edu](mailto:Jian.Li@monash.edu)

## **Multivariate analysis of global metabolic changes for *P. aeruginosa* FADDI-PA111 & LESB58 after polymyxin B, amikacin, and their combination treatment**

Untargeted metabolomics was employed to profile the metabolic changes in *P. aeruginosa* FADDI-PA111 and LESB58 treated with polymyxin B and amikacin monotherapy or in combination at 15 min, 1 and 4 h. Four biological replicates were independently prepared from different cultures on separate days, and all of the samples were analyzed in a single LC-MS run. The analytical and technical variations in the experiment were monitored based on periodic analysis of pooled biological quality control (PBQC) samples in the run. The median relative standard deviation (RSD) of the PBQC, an indicator for analytical reproducibility, was 16% for FADDI-PA111 and 18% for LESB58; which are well within the acceptable limits for metabolomics data (**Supplementary Tables 1A&B**).<sup>1</sup> In addition, the principle component analysis (PCA) plots for both test strains showed that the PBQC samples tightly clustered together, indicating well-controlled technical variability (**Supplementary Figure S1**). The intragroup median RSD varies from 17% to 30% for FADDI-PA111, and from 20% to 30% for LESB58 (**Supplementary Tables 1A and 1B**). A total of 1142 and 541 metabolites were putatively identified in FADDI-PA111 and LESB58, respectively, including carbohydrates, energy metabolites, amino acids, nucleotides, lipids and peptides. Partial least squares discriminant analysis (PLSDA) plots (**Supplementary Figures S2A and S2B**) and heatmaps (**Supplementary Figures S3A and S3B**) revealed the extent of global metabolic changes in FADDI-PA111 and LESB58 induced by antibiotic treatment at each time point. One-way ANOVA analysis of FADDI-PA111 revealed that approximately 4-10%, 3-4.7% and 8-17% of metabolites were significantly altered following polymyxin B, amikacin and their combination, respectively (**Supplementary Figure S3A**). On the other hand, a marginal response was observed with the highly resistant strain LESB58 in which only 4.6-7% and

0.5-3.3% of its metabolome underwent a significant perturbation following polymyxin B mono- or combination therapy and amikacin alone, respectively (**Supplementary Figure S4B**).

Treatment of FADDI-PA111 with the polymyxin B-amikacin combination perturbed 46 and 118 additional unique metabolites (i.e. that were not altered by either polymyxin B or amikacin monotherapy) at 15 min and 1 h, respectively (**Supplementary Figure 5A**). Similarly, the combination perturbed 16 and 15 additional metabolites in LESB58 that were not affected by each antibiotic monotherapy (**Supplementary Figure 5B**). At early time points (15 min and 1 h) polymyxin B monotherapy and the combination treatment induced a significant suppression of the levels of the perturbed metabolites; then at the latter time point (4 h), polymyxin B monotherapy induced a marked elevation in metabolite levels (**Supplementary Figures S6A and S6B**).

**Supplementary Table 1.** Data precision of individual samples represented as the median relative standard deviation (RSD) for all metabolites of **(A)** *P. aeruginosa* FADDI-PA111 & **(B)** LESB58 based on all replicates (n=4) of each group (n=19 for technical replicates of PBQCs).

**A.**

| 15 min      | Median RSD % |
|-------------|--------------|
| Control     | 27           |
| Polymyxin B | 24           |
| Amikacin    | 22           |
| Combination | 21           |

  

| 1 h         |    |
|-------------|----|
| Control     | 17 |
| Polymyxin B | 29 |
| Amikacin    | 22 |
| Combination | 22 |

  

| 4 h         |    |
|-------------|----|
| Control     | 24 |
| Polymyxin B | 24 |
| Amikacin    | 25 |
| Combination | 21 |
| PBQCs       | 16 |

**B.**

| 15 min      | Median RSD % |
|-------------|--------------|
| Control     | 30           |
| Polymyxin B | 30           |
| Amikacin    | 29           |
| Combination | 30           |

  

| 1 h         |    |
|-------------|----|
| Control     | 29 |
| Polymyxin B | 26 |
| Amikacin    | 26 |
| Combination | 32 |

  

| 4 h         |    |
|-------------|----|
| Control     | 20 |
| Polymyxin B | 29 |
| Amikacin    | 24 |
| Combination | 27 |
| PBQCs       | 18 |

**Supplementary Table 2.** The influenced purine/pyrimidine nucleotide pools after treatment with polymyxin B, amikacin, and the combination at 1 hr ( $\geq 1.0$ -log<sub>2</sub>-fold,  $p \leq 0.05$ ; FDR  $\leq 0.1$ ). Note: The significant metabolites represented in italic and bold font.

| Purine metabolism                                     |                                                                                     |                                                    | Pyrimidine metabolism           |                                                                              |                                                                |                                                                                                                                                         |
|-------------------------------------------------------|-------------------------------------------------------------------------------------|----------------------------------------------------|---------------------------------|------------------------------------------------------------------------------|----------------------------------------------------------------|---------------------------------------------------------------------------------------------------------------------------------------------------------|
| <i>Anabolism</i>                                      |                                                                                     | <i>Catabolism</i>                                  | <i>Catabolism</i>               |                                                                              | <i>Anabolism</i>                                               |                                                                                                                                                         |
| <b>Ribose 5-phosphate</b> →IMP                        | IMP→AMP <sup>3</sup>                                                                | IMP→GMP                                            | Hyoxanthine <sup>3</sup>        | Uracil                                                                       | Thymine                                                        | Carbamoyl phosphate                                                                                                                                     |
| <b>Ribose 5-phosphate</b> <sup>3</sup>                | Adenylosuccinate                                                                    | Xanthine monophosphate                             | <b>Xanthine</b> <sup>1, 3</sup> | <b>Dihydrouracil</b> <sup>3</sup> ,<br><b>5,6-Dihydrouracil</b> <sup>3</sup> | Dihydrothymine                                                 | Carbamoyl aspartic acid                                                                                                                                 |
| Phosphoribosyl pyrophosphate                          | <b>ADP</b> <sup>3</sup> , <b>ADP-ribose</b> <sup>3</sup> , <b>dADP</b> <sup>3</sup> | GDP, dGDP                                          | <b>Urate</b> <sup>3</sup>       | 3-Ureidopropionic acid                                                       | β-Ureidoisobutyric acid                                        | 4,5-Dihydroorotic acid                                                                                                                                  |
| <b>Phosphoribosylamine</b> <sup>2</sup>               | ATP, dATP                                                                           | GTP, dGTP                                          | 5-Hydroxyisourate               | β-Alanine                                                                    | 3-Aminoisobutyric acid                                         | <b>Orotate</b> <sup>1</sup>                                                                                                                             |
| 5'-Phosphoribosyl-4-carboxy-5-aminoimidazole          |                                                                                     | <b>GMP</b> <sup>3</sup> , <b>dGMP</b> <sup>3</sup> | <b>Allantoate</b> <sup>3</sup>  |                                                                              | <b>5-Methylcytosine</b>                                        | <b>Uridine monophosphate (UMP)</b> <sup>3</sup> , <b>UDP</b> <sup>3</sup>                                                                               |
| 5-Aminoimidazole-4-carboxamide ribonucleotide (AICAR) |                                                                                     | <b>Guanine</b> <sup>3</sup>                        |                                 |                                                                              | <b>2',3'-Cyclic CMP</b> <sup>3</sup> , <b>CMP</b> <sup>3</sup> | <b>dTMP</b> <sup>1,3</sup> , <b>dTDP</b> <sup>1,3</sup> , <b>dCMP</b> <sup>3</sup> , <b>dAMP</b> <sup>3</sup> , <b>dTTP</b> , <b>dCDP</b> , <b>dCTP</b> |

<sup>1</sup> PMB affected metabolites.

<sup>2</sup> AMK affected metabolites.

<sup>3</sup> COM affected metabolites.

**Supplementary Table 3.** Significant metabolites identified following exposure to polymyxin B and amikacin alone and in combination in polymyxin-resistant LESB58. Significant fold-changes are highlighted in bold and italic. One-way ANOVA for multiple comparisons, FDR  $\leq$  0.1; Fisher's LSD,  $p \leq 0.05$ .

| Mass     | RT (min) | Formula       | Putative metabolite                    | IDEOM Confidence | Map                   | Pathway                                                 | Log2-fold change       |                       |                        | FDR       |
|----------|----------|---------------|----------------------------------------|------------------|-----------------------|---------------------------------------------------------|------------------------|-----------------------|------------------------|-----------|
|          |          |               |                                        |                  |                       |                                                         | Polymyxin B            | Amikacin              | Combination            |           |
|          |          |               |                                        |                  |                       |                                                         | <i>15 min</i>          |                       |                        |           |
| 165.0462 | 13.10    | C5H11NO3S     | L-Methionine S-oxide                   | 7                | Amino acid metabolism | Methionine metabolism                                   | <b><i>-7.5999</i></b>  | <b><i>-7.1219</i></b> | 0.88466                | 6.401E-05 |
| 612.1521 | 16.98    | C20H32N6O12S2 | Glutathione disulfide                  | 8                | Amino acid metabolism | Glutathione metabolism                                  | <b><i>-2.0721</i></b>  | -1.44                 | -0.59261               | 1.401E-05 |
| 312.0225 | 15.72    | C9H16N2O5Se   | gamma-Glutamyl-Se-methylselenocysteine | 7                | Amino acid metabolism | Selenoamino acid metabolism                             | <b><i>-0.99182</i></b> | -0.62288              | -0.48509               | 2.137E-02 |
| 160.0846 | 10.77    | C6H12N2O3     | D-Alanyl-D-alanine                     | 6                | Amino acid metabolism | D-Alanine metabolism; Peptidoglycan biosynthesis        | <b><i>-0.64792</i></b> | -0.33231              | -0.12347               | 1.368E-02 |
| 147.0532 | 14.22    | C5H9NO4       | O-Acetyl-L-serine                      | 10               | Amino acid metabolism | Cysteine metabolism;Selenoamino acid metabolism         | <b><i>-1.1389</i></b>  | -0.19854              | -0.48976               | 5.137E-03 |
| 147.0532 | 14.22    | C5H9NO4       | L-Glutamate                            | 10               | Amino acid metabolism | Arginine and proline metabolism; Glutathione metabolism | <b><i>-1.1389</i></b>  | -0.46318              | 0.21307                | 1.755E-03 |
| 426.0881 | 16.59    | C13H22N4O8S2  | S-glutathionyl-L-cysteine              | 8                | Amino acid metabolism | Cysteine metabolism                                     | <b><i>-1.4395</i></b>  | 0.54329               | 0.12453                | 5.435E-02 |
| 161.0477 | 8.25     | C9H7NO2       | 4,8-Dihydroxyquinoline                 | 7                | Amino acid metabolism | Tryptophan metabolism                                   | -1.3968                | -0.88934              | <b><i>-0.68394</i></b> | 1.928E-02 |

|          |       |               |                                            |    |                         |                                                                                                         |                 |          |                 |           |
|----------|-------|---------------|--------------------------------------------|----|-------------------------|---------------------------------------------------------------------------------------------------------|-----------------|----------|-----------------|-----------|
| 612.1521 | 16.98 | C20H32N6O12S2 | Glutathione disulfide                      | 8  | Amino acid metabolism   | Glutamate metabolism;<br>Glutathione metabolism                                                         | -2.0721         | -1.44    | <b>-1.2132</b>  | 2.013E-02 |
| 194.0426 | 13.95 | C6H10O7       | 2-Dehydro-D-gluconate                      | 8  | Carbohydrate metabolism | Pentose phosphate pathway                                                                               | <b>-1.1452</b>  | -0.77251 | <b>-0.76351</b> | 5.435E-04 |
| 104.0109 | 13.95 | C3H4O4        | 2-Hydroxy-3-oxopropanoate                  | 6  | Carbohydrate metabolism | Ascorbate and aldarate metabolism;<br>Glyoxylate and dicarboxylate metabolism                           | <b>-1.0926</b>  | -0.70987 | -0.51012        | 7.175E-02 |
| 185.9929 | 16.37 | C3H7O7P       | 3-Phospho-D-glycerate                      | 10 | Carbohydrate metabolism | Glycolysis /<br>Gluconeogenesis, Glycine, serine and threonine ,Glycerolipid metabolism                 | <b>-0.84335</b> | -0.50782 | 0.07307         | 4.798E-04 |
| 563.0555 | 15.29 | C15H23N3O16P2 | UDP-L-Ara4FN                               | 8  | Carbohydrate metabolism | Nucleotide sugars metabolism                                                                            | <b>-0.89003</b> | -0.44922 | 0.03993         | 7.798E-04 |
| 179.0794 | 14.54 | C6H13NO5      | D-Glucosamine                              | 7  | Carbohydrate metabolism | Aminosugars metabolism                                                                                  | <b>-1.2901</b>  | -1.2614  | <b>-0.87236</b> | 3.798E-04 |
| 621.0610 | 17.14 | C17H25N3O18P2 | UDP-N-acetyl-2-amino-2-deoxy-D-glucuronate | 7  | Carbohydrate metabolism | Aminosugars metabolism                                                                                  | <b>-0.91453</b> | -0.30889 | -0.61197        | 9.798E-02 |
| 580.0345 | 18.40 | C15H22N2O18P2 | UDP-glucuronate                            | 8  | Carbohydrate metabolism | Pentose and glucuronate interconversions;<br>Nucleotide sugars metabolism                               | <b>-0.90056</b> | -0.30897 | -0.02344        | 4.769E-02 |
| 180.0634 | 14.58 | C6H12O6       | D-Glucose                                  | 8  | Carbohydrate metabolism | Glycolysis /<br>Gluconeogenesis; Pentose phosphate pathway;<br>Galactose ,Starch and sucrose metabolism | -0.8497         | -0.50118 | <b>-0.86691</b> | 7.889E-08 |
| 150.0528 | 14.53 | C5H10O5       | L-Arabinose                                | 6  | Carbohydrate metabolism | Pentose and glucuronate interconversions;<br>Nucleotide sugars metabolism                               | -0.41275        | -0.6668  | <b>-0.74672</b> | 1.078E-07 |
| 290.0405 | 15.73 | C7H15O10P     | D-Sedoheptulose 7-phosphate                | 8  | Carbohydrate            | Pentose phosphate                                                                                       | <b>-0.85096</b> | -0.45427 | -0.50056        | 1.180E-   |

|          |       |                |                                            |    |                       |                                                                                         |                 |           |                |           |
|----------|-------|----------------|--------------------------------------------|----|-----------------------|-----------------------------------------------------------------------------------------|-----------------|-----------|----------------|-----------|
|          |       |                |                                            |    | metabolism            | pathway; Carbon fixation                                                                |                 |           |                | 02        |
| 743.0757 | 16.27 | C21H28N7O17P3  | NADP                                       | 10 | Energy metabolism     | Photosynthesis; Glutathione metabolism; Nicotinate and nicotinamide metabolism          | <b>-0.67683</b> | -0.25445  | 0.28846        | 1.459E-02 |
| 663.1095 | 13.84 | C21H27N7O14P2  | NAD                                        | 10 | Energy metabolism     | Oxidative phosphorylation; Glutamate metabolism; Nicotinate and nicotinamide metabolism | <b>-0.63447</b> | -0.21837  | 0.29254        | 1.749E-02 |
| 515.6802 | 7.51  | C39H68N7O17P3S | Oleoyl-CoA                                 | 6  | Lipid metabolism      | Biosynthesis of unsaturated fatty acids                                                 | <b>-1.0863</b>  | -0.98142  | -0.91111       | 3.149E-03 |
| 216.0401 | 14.35 | C5H13O7P       | 2-C-Methyl-D-erythritol 4-phosphate        | 6  | Lipid metabolism      | Biosynthesis of steroids                                                                | -1.4587         | -.98341   | <b>-1.0548</b> | 2.104E-04 |
| 173.1417 | 6.24  | C9H19NO2       | [FA amino(9:0)] 3R-aminononanoic acid      | 7  | Lipid metabolism      | Amino Fatty Acids                                                                       | -1.4395         | 0.48062   | <b>-1.3023</b> | 2.226E-03 |
| 188.1412 | 4.07  | C10H20O3       | [FA hydroxy(10:0)] 9-hydroxy-decanoic acid | 6  | Lipid metabolism      | Fatty Acids and Conjugates                                                              | -0.060985       | -0.00763  | <b>-2.4996</b> | 2.037E-02 |
| 287.2458 | 4.35  | C16H33NO3      | Lauroyl diethanolamide                     | 7  | Lipid metabolism      | Fatty Acyls                                                                             | -0.13359        | -0.082231 | <b>-1.1383</b> | 2.374E-03 |
| 340.2608 | 4.21  | C20H36O4       | [FA (20:2)] hydroperoxy-eicosadienoic acid | 7  | Lipid metabolism      | Fatty Acids and Conjugates                                                              | -0.6777         | -0.76651  | <b>1.11</b>    | 2.374E-06 |
| 258.1830 | 4.34  | C14H26O4       | Tetradecanedioic acid                      | 7  | Lipid metabolism      | Fatty Acids and Conjugates                                                              | -0.22685        | -0.35927  | <b>1.0139</b>  | 1.374E-04 |
| 257.1030 | 14.39 | C8H20NO6P      | sn-glycero-3-Phosphocholine                | 10 | Lipid metabolism      | Glycerophospholipid metabolism; Ether lipid metabolism                                  | -0.19634        | 0.026812  | <b>0.94275</b> | 7.420E-02 |
| 482.9844 | 17.62 | C9H16N3O14P3   | CTP                                        | 10 | Nucleotide metabolism | Pyrimidine metabolism                                                                   | <b>-1.0393</b>  | -0.49808  | 0.13509        | 1.221E-02 |
| 403.0183 | 16.45 | C9H15N3O11P2   | CDP                                        | 8  | Nucleotide metabolism | Pyrimidine metabolism                                                                   | <b>-0.71695</b> | -0.28482  | 0.31577        | 1.254E-02 |



|          |       |             |                                       |    |                       |                                                           |                 |                |                 |           |  |
|----------|-------|-------------|---------------------------------------|----|-----------------------|-----------------------------------------------------------|-----------------|----------------|-----------------|-----------|--|
| 136.0386 | 9.99  | C5H4N4O     | Hypoxanthine                          | 10 | Nucleotide metabolism | Purine metabolism                                         | -0.54538        | -0.24737       | <b>1.2739</b>   | 1.204E-03 |  |
| 405.1385 | 18.06 | C15H23N3O10 | Glu-Glu-Glu                           | 7  | Peptides metabolism   | Acidic peptide                                            | <b>-7.5786</b>  | <b>-3.8461</b> | <b>-0.84025</b> | 1.840E-02 |  |
| 534.1816 | 19.09 | C20H30N4O13 | Glu-Glu-Glu-Glu                       | 7  | Peptides metabolism   | Acidic peptide                                            | <b>-6.2528</b>  | <b>-5.7748</b> | <b>-5.7988</b>  | 3.486E-02 |  |
| 276.0960 | 16.72 | C10H16N2O7  | Glu-Glu                               | 7  | Peptides metabolism   |                                                           | <b>-1.7927</b>  | -0.92497       | 0.016992        | 3.582E-02 |  |
| 460.4640 | 15.68 | C18H31N5O9  | L-Ala-D-Glu-meso-A2pm                 | 6  | Peptides metabolism   | Peptidoglycan biosynthesis                                | <b>-0.63806</b> | -0.37585       | 0.22932         | 4.069E-02 |  |
| 224.0589 | 5.24  | C13H8N2O2   | phenazine-1-carboxylate               | 8  | Undefined             | phenazine-1-carboxylate & 2-hydroxyphenazine biosynthesis | <b>-3.5536</b>  | -0.89754       | <b>-1.3836</b>  | 1.860E-07 |  |
| 231.1259 | 4.91  | C14H17NO2   | Leioquinine A                         | 6  | Undefined             | Undefined                                                 | -1.3018         | -1.6398        | <b>-6.1463</b>  | 4.999E-03 |  |
| 326.1918 | 3.80  | C18H30O3S   | 2-Dodecylbenzenesulfonic acid         | 6  | Undefined             | Undefined                                                 | -0.021896       | 0.48381        | <b>0.93657</b>  | 2.308E-05 |  |
| 137.9987 | 7.48  | C3H6O4S     | 2-oxopropane sulfonate                | 6  | Undefined             | Undefined                                                 | 0.54672         | -0.9506        | <b>3.6557</b>   | 4.811E-03 |  |
| 266.1551 | 3.81  | C12H26O4S   | sodium dodecyl sulfate                | 7  | Undefined             | Undefined                                                 | -1.0399         | -0.64365       | <b>3.0042</b>   | 6.667E-02 |  |
| 113.9447 | 20.90 | H2O3S2      | H2S2O3                                | 8  | Undefined             | Undefined                                                 | 0.41202         | 0.014432       | <b>2.0416</b>   | 7.681E-03 |  |
|          |       |             |                                       |    |                       |                                                           |                 | <b>1h</b>      |                 |           |  |
| 129.0427 | 7.46  | C5H7NO3     | L-1-Pyrroline-3-hydroxy-5-carboxylate | 6  | Amino acid metabolism | Arginine and proline metabolism                           | <b>-1.1644</b>  | 0.1669         | -0.001232       | 2.340E-02 |  |
| 138.0429 | 10.37 | C6H6N2O2    | Urocanate                             | 10 | Amino acid metabolism | Histidine metabolism                                      | <b>-2.2423</b>  | -1.5838        | -0.45621        | 1.100E-06 |  |
| 165.0462 | 13.10 | C5H11NO3S   | L-Methionine S-oxide                  | 7  | Amino acid metabolism | Methionine metabolism                                     | <b>0.62124</b>  | -0.63594       | 0.26735         | 1.200E-06 |  |

|          |       |                |                                            |    |                         |                                                                                                |                 |                |                 |           |
|----------|-------|----------------|--------------------------------------------|----|-------------------------|------------------------------------------------------------------------------------------------|-----------------|----------------|-----------------|-----------|
| 129.0427 | 9.89  | C5H7NO3        | 5-Oxoproline                               | 9  | Amino acid metabolism   | Glutathione metabolism                                                                         | -1.1644         | <b>-1.4879</b> | -0.39902        | 4.860E-04 |
| 138.0429 | 10.37 | C6H6N2O2       | Urocanate                                  | 10 | Amino acid metabolism   | Histidine metabolism                                                                           | -1.2423         | <b>-2.5838</b> | -0.02316        | 4.529E-04 |
| 132.0898 | 22.10 | C5H12N2O2      | L-Ornithine                                | 10 | Amino acid metabolism   | Arginine and proline metabolism; D-Arginine and D-ornithine metabolism; Glutathione metabolism | -0.48701        | -0.05431       | <b>-0.82265</b> | 4.635E-04 |
| 342.1163 | 14.81 | C12H22O11      | 1-alpha-D-Galactosyl-myoinositol           | 7  | Carbohydrate metabolism | Galactose metabolism                                                                           | -0.21342        | -0.38994       | <b>-0.79281</b> | 6.600E-05 |
| 262.0449 | 14.36 | C6H15O9P       | D-Mannitol 1-phosphate                     | 7  | Carbohydrate metabolism | Fructose and mannose metabolism                                                                | 0.46098         | -0.5467        | <b>-0.98358</b> | 5.421E-03 |
| 164.0686 | 7.47  | C6H12O5        | L-Rhamnulose                               | 6  | Carbohydrate metabolism | Fructose and mannose metabolism                                                                | 0.00213         | 0.03216        | <b>2.5703</b>   | 7.683E-03 |
| 182.0791 | 13.70 | C6H14O6        | Mannitol                                   | 10 | Carbohydrate metabolism | Fructose and mannose metabolism                                                                | -0.77644        | -0.38216       | <b>2.8228</b>   | 5.600E-05 |
| 188.1412 | 4.07  | C10H20O3       | [FA hydroxy(10:0)] 9-hydroxy-decanoic acid | 6  | Lipid metabolism        | Fatty Acids and Conjugates                                                                     | <b>-2.9594</b>  | -0.13905       | -0.20017        | 4.502E-02 |
| 351.3137 | 4.22  | C22H41NO2      | N-(11Z,14Z-eicosadienyl)-ethanolamine      | 7  | Lipid metabolism        | Fatty amides                                                                                   | <b>-7.0566</b>  | -0.37887       | -0.43527        | 3.000E-06 |
| 281.2720 | 4.32  | C18H35NO       | [FA (18:1)] 9Z-octadecenamide              | 7  | Lipid metabolism        | Fatty amides                                                                                   | <b>-0.91243</b> | -0.26163       | <b>-1.2172</b>  | 5.600E-05 |
| 118.0631 | 7.45  | C5H10O3        | Methyl 3-hydroxybutyrate                   | 7  | Lipid metabolism        | Undefined                                                                                      | <b>0.63759</b>  | 0.24605        | -0.11484        | 5.670E-04 |
| 258.1830 | 4.34  | C14H26O4       | [FA (14:0/2:0)] Tetradecanedioic acid      | 7  | Lipid metabolism        | Fatty Acids and Conjugates                                                                     | <b>1.1663</b>   | 0.11072        | -0.68301        | 2.200E-03 |
| 173.1417 | 7.09  | C9H19NO2       | [FA amino(9:0)] 3R-aminononanoic acid      | 7  | Lipid metabolism        | Amino Fatty Acids                                                                              | <b>1.5666</b>   | <b>1.0313</b>  | <b>-0.83526</b> | 3.334E-03 |
| 501.6649 | 7.61  | C37H64N7O17P3S | PalmitoleylCoA                             | 6  | Lipid metabolism        | Fatty acids biosynthesis                                                                       | <b>-0.81337</b> | 0.45368        | 0.28209         | 3.410E-04 |

|          |       |                |                                                                       |    |                       |                                                             |                 |                |                 |           |
|----------|-------|----------------|-----------------------------------------------------------------------|----|-----------------------|-------------------------------------------------------------|-----------------|----------------|-----------------|-----------|
| 510.2956 | 3.99  | C24H47O9P      | [PG (18:1)] 1-(9E-octadecenoyl)-sn-glycero-3-phospho-(1'-sn-glycerol) | 6  | Lipid metabolism      | Glycerophosphoglycerols                                     | <b>1.1122</b>   | 0.16879        | <b>0.8169</b>   | 3.660E-04 |
| 576.3790 | 3.64  | C30H57O8P      | PA(27:1)                                                              | 6  | Lipid metabolism      | Glycerophosphates                                           | <b>0.76572</b>  | 0.073461       | 0.23124         | 7.690E-02 |
| 493.3168 | 7.44  | C24H48NO7P     | LysoPC(16:1(9Z))                                                      | 6  | Lipid metabolism      | Glycerophosphocholines                                      | <b>0.79872</b>  | 0.48033        | -0.088884       | 5.255E-03 |
| 229.2405 | 5.07  | C14H31NO       | [SP (14:0)] 1-deoxy-tetradecasphinganine                              | 7  | Lipid metabolism      | Sphingoid bases                                             | <b>-0.79962</b> | -1.0244        | <b>-1.4779</b>  | 8.764E-03 |
| 257.1030 | 14.39 | C8H20NO6P      | sn-glycero-3-Phosphocholine                                           | 10 | Lipid metabolism      | Glycerophospholipid metabolism                              | <b>0.77398</b>  | <b>0.62314</b> | -0.15812        | 4.566E-03 |
| 515.6802 | 7.51  | C39H68N7O17P3S | Oleoyl-CoA                                                            | 6  | Lipid metabolism      | Biosynthesis of unsaturated fatty acids                     | <b>-0.82446</b> | -0.66111       | -0.28644        | 8.902E-03 |
| 225.9871 | 12.08 | C5H7O8P        | [PA] 1,2-diacyl-sn-glycero-3-phosphate                                | 6  | Lipid metabolism      | GlycerophosphoLipid                                         | <b>0.62447</b>  | 0.56901        | 0.02437         | 4.557E-04 |
| 674.4888 | 3.84  | C37H71O8P      | PA(34:1)                                                              | 7  | Lipid metabolism      | Glycerophosphates                                           | 0.83948         | <b>0.76673</b> | -0.52988        | 2.100E-05 |
| 150.1044 | 4.72  | C10H14O        | [PR] (-)-Carvone                                                      | 7  | Lipid metabolism      | Monoterpenoid biosynthesis; Limonene and pinene degradation | -0.69269        | -0.28857       | <b>-0.8422</b>  | 8.401E-02 |
| 222.1620 | 4.34  | C14H22O2       | 7E,9E,11-Dodecatrienyl acetate                                        | 6  | Lipid metabolism      | Fatty esters                                                | -0.24987        | -0.37112       | <b>-0.92367</b> | 6.758E-03 |
| 142.0994 | 4.57  | C8H14O2        | FA (8:1)                                                              | 7  | Lipid metabolism      | Fatty Acids and Conjugates                                  | -0.34502        | -0.22322       | <b>-0.98658</b> | 5.350E-04 |
| 298.2873 | 3.80  | C19H38O2       | FA methyl(18:0)                                                       | 7  | Lipid metabolism      | Fatty Acids and Conjugates                                  | -0.56431        | 0.043401       | <b>-1.0455</b>  | 7.861E-03 |
| 168.0283 | 11.96 | C5H4N4O3       | Urate                                                                 | 10 | Nucleotide metabolism | Purine metabolism                                           | <b>1.0698</b>   | -0.34379       | -0.25133        | 7.200E-04 |
| 306.0856 | 9.21  | C14H14N2O6     | 2-oxindole-3-acetyl-asp                                               | 7  | Undefined             | Undefined                                                   | <b>1.3531</b>   | <b>1.503</b>   | <b>0.84977</b>  | 4.400E-05 |

|          |      |           |                             |   |           |                         |                |                |                 |           |
|----------|------|-----------|-----------------------------|---|-----------|-------------------------|----------------|----------------|-----------------|-----------|
| 149.1052 | 9.35 | C6H15NO3  | Triethanolamine             | 7 | Undefined | Undefined               | <b>-1.6516</b> | <b>-1.3446</b> | <b>-1.4302</b>  | 4.400E-05 |
| 243.1831 | 4.83 | C13H25NO3 | N-Undecanoylglycine         | 7 | Undefined | Undefined               | <b>-1.5017</b> | -0.97803       | <b>-0.92982</b> | 5.044E-02 |
| 215.1521 | 5.24 | C11H21NO3 | N-Nonanoylglycine           | 7 | Undefined | Undefined               | <b>-1.4957</b> | -1.1484        | <b>-1.411</b>   | 2.311E-03 |
| 309.3035 | 4.27 | C20H39NO  | N-Hexadecanoylpyrrolidine   | 6 | Undefined | Undefined               | <b>-1.3586</b> | 0.47073        | <b>-1.6755</b>  | 5.941E-03 |
| 229.1678 | 5.04 | C12H23NO3 | N-Decanoylglycine           | 6 | Undefined | Undefined               | <b>-1.2343</b> | <b>-1.5254</b> | <b>-0.83041</b> | 3.459E-02 |
| 266.1551 | 3.81 | C12H26O4S | sodium dodecyl sulfate      | 7 | Undefined | Undefined               | <b>-1.1206</b> | -0.49145       | <b>1.6589</b>   | 1.600E-06 |
| 86.0730  | 4.72 | C5H10O    | 3-Methylbutanal             | 8 | Undefined | leucine degradation III | 0.97557        | <b>-1.8471</b> | 0.35249         | 5.111E-03 |
| 231.1259 | 4.91 | C14H17NO2 | Leikinine A                 | 6 | Undefined | Undefined               | -0.45431       | <b>-1.2529</b> | <b>-1.0201</b>  | 9.210E-02 |
| 302.2246 | 4.22 | C20H30O2  | Retinyl ester               | 7 | Undefined | Undefined               | -0.76867       | <b>-1.2349</b> | -0.71977        | 4.561E-04 |
| 138.0317 | 5.04 | C7H6O3    | Sesamol                     | 7 | Undefined | Undefined               | 0.91138        | <b>-1.5701</b> | 2.5703          | 4.500E-04 |
| 137.9987 | 7.48 | C3H6O4S   | 2-oxopropane sulfonate      | 6 | Undefined | Undefined               | 0.43217        | 0.01543        | <b>5.4643</b>   | 5.012E-02 |
| 299.2250 | 4.54 | C20H29NO  | 2-Undecyl-4(1H)-quinolinone | 6 | Undefined | Undefined               | 0.45691        | 0.50698        | <b>0.7021</b>   | 4.516E-03 |
| 138.0430 | 7.47 | C6H6N2O2  | 4-Nitroaniline              | 6 | Undefined | Undefined               | -1.5077        | -1.7301        | <b>-2.6327</b>  | 2.130E-04 |
| 134.0731 | 5.26 | C9H10O    | Indan-1-ol                  | 6 | Undefined | Undefined               | -0.13608       | -0.1011        | <b>1.6025</b>   | 5.003E-02 |
| 439.4027 | 4.16 | C27H53NO3 | Pentacosanoylglycine        | 6 | Undefined | Undefined               | -0.501452      | -0.1475        | <b>-0.8168</b>  | 9.679E-02 |

|          |       |               |                        |    |                           |                                                                                |               |               |                |           |  |
|----------|-------|---------------|------------------------|----|---------------------------|--------------------------------------------------------------------------------|---------------|---------------|----------------|-----------|--|
| 298.1418 | 7.45  | C15H22O6      | Toxin T2 tetrol        | 7  | Undefined                 | Undefined                                                                      | 0.00541       | 0.76546       | <b>7.1457</b>  | 7.858E-04 |  |
| 137.0477 | 7.51  | C7H7NO2       | Anthranilate           | 10 | Xenobiotic biodegradation | Benzoate degradation via hydroxylation; Phenylalanine & Tryptophan metabolism; | -0.48712      | -0.49344      | <b>0.73156</b> | 2.430E-04 |  |
|          |       |               |                        |    |                           |                                                                                | <b>4h</b>     |               |                |           |  |
| 129.0427 | 9.89  | C5H7NO3       | 5-Oxoproline           | 9  | Amino Acid Metabolism     | Glutathione metabolism                                                         | <b>1.0977</b> | 1.0309        | 0.391          | 1.646E-03 |  |
| 165.0462 | 13.10 | C5H11NO3S     | L-Methionine S-oxide   | 7  | Amino Acid Metabolism     | Methionine metabolism                                                          | <b>1.3273</b> | 0.5536        | 1.1297         | 2.054E-03 |  |
| 221.0901 | 11.73 | C8H15NO6      | N-Acetyl-D-glucosamine | 8  | Amino Acid Metabolism     | Glutamate metabolism; Aminosugars metabolism                                   | 0.67253       | 0.49892       | 0.070738       | 5.410E-04 |  |
| 612.1521 | 16.98 | C20H32N6O12S2 | Glutathione disulfide  | 8  | Amino Acid Metabolism     | Glutamate metabolism; Glutathione metabolism                                   | 0.22323       | <b>1.2833</b> | 0.26186        | 5.361E-02 |  |
| 149.0511 | 11.36 | C5H11NO2S     | L-Methionine           | 10 | Amino Acid Metabolism     | Methionine metabolism                                                          | 0.76187       | <b>1.0339</b> | 0.45203        | 1.543E-02 |  |
| 165.0462 | 13.10 | C5H11NO3S     | L-Methionine S-oxide   | 7  | Amino Acid Metabolism     | Methionine metabolism                                                          | 1.3273        | <b>1.5536</b> | 1.1297         | 6.545E-02 |  |
| 161.0688 | 11.11 | C6H11NO4      | O-Acetyl-L-homoserine  | 8  | Amino Acid Metabolism     | Methionine metabolism; Sulfur metabolism                                       | 0.84504       | <b>1.3323</b> | 0.16532        | 5.555E-04 |  |
| 138.0429 | 10.37 | C6H6N2O2      | Urocanate              | 10 | Amino Acid Metabolism     | Histidine metabolism                                                           | 0.05647       | <b>1.9377</b> | 0.10879        | 3.623E-02 |  |
| 189.0425 | 7.52  | C10H7NO3      | Kynurenate             | 10 | Amino Acid Metabolism     | Tryptophan metabolism                                                          | 0.45771       | 0.12079       | <b>0.66313</b> | 7.372E-04 |  |
| 179.0794 | 14.54 | C6H13NO5      | D-Glucosamine          | 7  | Carbohydrate Metabolism   | Aminosugars metabolism                                                         | <b>1.0616</b> | <b>1.6558</b> | <b>0.96637</b> | 1.375E-03 |  |
| 180.0634 | 14.58 | C6H12O6       | D-Glucose              | 8  | Carbohydrate Metabolism   | Glycolysis / Gluconeogenesis; Pentose phosphate pathway;                       | <b>1.1627</b> | 1.7737        | <b>1.2773</b>  | 7.110E-04 |  |

|          |       |           |                                     |    |                         |                                                                                                                                                                      |                |                 |                 |           |
|----------|-------|-----------|-------------------------------------|----|-------------------------|----------------------------------------------------------------------------------------------------------------------------------------------------------------------|----------------|-----------------|-----------------|-----------|
| 275.1007 | 7.82  | C11H17NO7 | 1,6-anhydro-N-acetylmuramate        | 8  | Carbohydrate metabolism | Aminosugars metabolism                                                                                                                                               | <b>0.75264</b> | 0.48842         | 0.012913        | 6.640E-04 |
| 342.1163 | 14.81 | C12H22O11 | 1-alpha-D-Galactosyl-myoinositol    | 7  | Carbohydrate metabolism | Galactose metabolism                                                                                                                                                 | <b>0.59541</b> | 0.50981         | 0.45865         | 4.646E-02 |
| 88.0523  | 7.46  | C4H8O2    | Butanoic acid                       | 6  | Carbohydrate Metabolism | Butanoate metabolism                                                                                                                                                 | <b>0.65677</b> | 0.37058         | 0.072155        | 4.605E-02 |
| 150.0528 | 14.53 | C5H10O5   | L-Arabinose                         | 6  | Carbohydrate Metabolism | Pentose and glucuronate interconversions; Nucleotide sugars metabolism                                                                                               | <b>0.671</b>   | 0.07632         | 0.04512         | 1.054E-02 |
| 293.1107 | 9.89  | C11H19NO8 | N-Acetylmuramate                    | 8  | Carbohydrate metabolism | Aminosugars metabolism                                                                                                                                               | <b>1.4331</b>  | 0.90324         | 0.56312         | 1.054E-04 |
| 192.0271 | 17.50 | C6H8O7    | Citrate                             | 10 | Carbohydrate Metabolism | Citrate cycle (TCA cycle);Glutamate metabolism; Alanine and aspartate metabolism;Glyoxylate and dicarboxylate metabolism; Reductive carboxylate cycle (CO2 fixation) | -0.23258       | -0.04710        | <b>-0.61015</b> | 2.687E-02 |
| 281.2720 | 4.32  | C18H35NO  | [FA (18:1)] 9Z-octadecenamide       | 7  | Lipid metabolism        | Fatty amides                                                                                                                                                         | <b>1.8107</b>  | <b>2.358</b>    | <b>2.6155</b>   | 5.757E-04 |
| 216.0401 | 14.35 | C5H13O7P  | 2-C-Methyl-D-erythritol 4-phosphate | 6  | Lipid Metabolism        | Biosynthesis of steroids                                                                                                                                             | <b>1.1641</b>  | 0.6837          | <b>0.99432</b>  | 1.230E-04 |
| 312.3031 | 3.90  | C20H40O2  | FA (20:0)                           | 7  | Lipid Metabolism        | Fatty Acids and Conjugates                                                                                                                                           | <b>1.0331</b>  | 0.1782          | <b>1.2207</b>   | 6.540E-04 |
| 300.2666 | 4.04  | C18H36O3  | FA hydroxy(18:0)                    | 6  | Lipid Metabolism        | Fatty Acids and Conjugates                                                                                                                                           | <b>1.4768</b>  | 1.1219          | <b>1.3136</b>   | 2.500E-05 |
| 142.0994 | 4.57  | C8H14O2   | FA (8:1)                            | 7  | Lipid Metabolism        | Fatty Acids and Conjugates                                                                                                                                           | -0.91316       | <b>-0.73133</b> | <b>-0.88279</b> | 5.000E-05 |
| 256.2401 | 3.97  | C16H32O2  | FA(16:0)                            | 8  | Lipid Metabolism        | Fatty acid biosynthesis; Fatty acid elongation in                                                                                                                    | 0.71791        | <b>0.82066</b>  | <b>0.9288</b>   | 1.235E-02 |

|          |       |                |                                       |   |                  |                                                                        |                |                 |                 |           |
|----------|-------|----------------|---------------------------------------|---|------------------|------------------------------------------------------------------------|----------------|-----------------|-----------------|-----------|
|          |       |                |                                       |   |                  | mitochondria;<br>Biosynthesis of<br>unsaturated fatty acids            |                |                 |                 |           |
| 287.2458 | 4.35  | C16H33NO3      | Lauroyl diethanolamide                | 7 | Lipid Metabolism | Undefined                                                              | -0.63925       | <b>-1.2017</b>  | <b>-1.3047</b>  | 2.438E-04 |
| 284.2715 | 3.93  | C18H36O2       | Octadecanoic acid                     | 8 | Lipid Metabolism | Fatty acid biosynthesis;<br>Biosynthesis of<br>unsaturated fatty acids | <b>1.1257</b>  | <b>1.2103</b>   | <b>1.3226</b>   | 1.460E-03 |
| 576.3790 | 3.64  | C30H57O8P      | PA(27:1)                              | 6 | Lipid Metabolism | Glycerophosphates                                                      | <b>1.2251</b>  | -0.00356        | <b>1.1006</b>   | 7.746E-04 |
| 258.1830 | 4.34  | C14H26O4       | FA methyl(15:0) tridecanedioic acid   | 7 | Lipid Metabolism | Fatty Acids and Conjugates                                             | <b>1.2117</b>  | 1.5271          | 1.8673          | 2.980E-02 |
| 327.3137 | 5.12  | C20H41NO2      | N,N-Dimethylsphing-4-enine            | 6 | Lipid metabolism | Sphingoid bases                                                        | <b>0.60779</b> | 0.29783         | 0.70324         | 1.054E-02 |
| 515.6802 | 7.51  | C39H68N7O17P3S | Oleoyl-CoA                            | 6 | Lipid Metabolism | Biosynthesis of<br>unsaturated fatty acids                             | <b>1.3827</b>  | 0.14697         | 0.23106         | 6.057E-04 |
| 173.1417 | 6.24  | C9H19NO2       | [FA amino(9:0)] 3R-aminononanoic acid | 7 | Lipid Metabolism | Amino Fatty Acids                                                      | 0.25533        | <b>-0.88406</b> | 0.1592          | 5.285E-02 |
| 340.3341 | 3.88  | C22H44O2       | Docosanoic acid                       | 6 | Lipid Metabolism | Biosynthesis of<br>unsaturated fatty acids                             | 0.7739         | 0.82107         | <b>1.0437</b>   | 5.687E-02 |
| 270.2560 | 3.95  | C17H34O2       | FA (17:0)                             | 6 | Lipid Metabolism | Fatty Acids and Conjugates                                             | 0.78007        | 0.89118         | <b>1.0869</b>   | 5.908E-02 |
| 214.1932 | 4.08  | C13H26O2       | FA methyl(12:0) dodecanoic acid       | 5 | Lipid Metabolism | Fatty Acids and Conjugates                                             | 0.62896        | 0.10098         | <b>1.0196</b>   | 6.097E-03 |
| 242.2247 | 4.00  | C15H30O2       | FA methyl(14:0)                       | 5 | Lipid Metabolism | Fatty Acids and Conjugates                                             | 0.66988        | 0.82051         | <b>1.012</b>    | 1.097E-02 |
| 338.3185 | 3.88  | C22H42O2       | FA (22:1)                             | 5 | Lipid Metabolism | Fatty Acids and Conjugates                                             | -0.36074       | 0.43925         | <b>1.2306</b>   | 2.147E-03 |
| 246.0506 | 12.29 | C6H15O8P       | Glycerophosphoglycerol                | 7 | Lipid Metabolism | Glycerophospholipid<br>metabolism                                      | -0.055426      | 0.43727         | <b>-0.70544</b> | 9.557E-02 |

|          |       |             |                                                   |   |                       |                            |                |                 |                |           |
|----------|-------|-------------|---------------------------------------------------|---|-----------------------|----------------------------|----------------|-----------------|----------------|-----------|
| 327.3137 | 5.12  | C20H41NO2   | Stearoyl-EA                                       | 6 | Lipid metabolism      | Fatty amides               | 0.60779        | 0.27481         | <b>0.70324</b> | 7.838E-02 |
| 102.0429 | 7.46  | C3H6N2O2    | N-Formiminoglycine                                | 6 | Nucleotide metabolism | Purine metabolism          | <b>0.59541</b> | 0.04371         | 0.05692        | 5.057E-02 |
| 390.1756 | 16.21 | C15H26N4O8  | L-Ala-D-Glu-meso-A2pm                             |   | Peptides metabolism   | Peptidoglycan biosynthesis | <b>0.6232</b>  | 0.23399         | 0.031243       | 5.054E-02 |
| 86.0730  | 4.72  | C5H10O      | 3-Methylbutanal                                   | 8 | Undefined             | leucine degradation III    | -0.9642        | <b>-5.8974</b>  | <b>-1.2316</b> | 8.752E-03 |
| 243.1831 | 4.83  | C13H25NO3   | N-Undecanoylglycine                               | 7 | Undefined             | Undefined                  | <b>1.2175</b>  | <b>1.7638</b>   | <b>2.9454</b>  | 3.425E-02 |
| 145.0525 | 4.76  | C9H7NO      | Quinolin-4-ol                                     | 6 | Undefined             | Undefined                  | <b>0.79119</b> | 0.04566         | <b>0.75885</b> | 7.746E-02 |
| 243.1624 | 5.25  | C16H21NO    | Chalciporone                                      | 7 | Undefined             | Undefined                  | <b>0.63178</b> | -0.33865        | 0.17718        | 4.867E-02 |
| 376.1632 | 8.43  | C19H24N2O6  | Diacetylfusarochromanone                          | 7 | Undefined             | Undefined                  | <b>0.59973</b> | 0.06512         | 0.53263        | 4.867E-02 |
| 289.1682 | 4.52  | C17H23NO3   | Dihydroferuperine                                 | 6 | Undefined             | Undefined                  | <b>1.0645</b>  | -0.01693        | 0.92506        | 4.920E-02 |
| 478.1803 | 10.23 | C19H30N2O12 | glcNAc-1,6-anhMurNAc                              | 8 | Undefined             | Undefined                  | <b>0.74994</b> | 0.32095         | 0.25752        | 2.054E-02 |
| 287.1885 | 5.21  | C18H25NO2   | Isolobinine                                       | 7 | Undefined             | Undefined                  | <b>1.1992</b>  | 0.96339         | 1.1972         | 4.054E-02 |
| 263.1523 | 3.85  | C15H21NO3   | N-(Heptan-4-yl)benzo[d][1,3]dioxole-5-carboxamide | 6 | Undefined             | Undefined                  | <b>0.58836</b> | -0.15104        | 0.39269        | 5.054E-02 |
| 306.0856 | 9.21  | C14H14N2O6  | 2-oxindole-3-acetyl-asp                           | 7 | Undefined             | Undefined                  | 0.02346        | <b>-0.74065</b> | 0.03415        | 5.357E-02 |
| 269.3083 | 7.47  | C18H39N     | Octadecylamine                                    | 7 | Undefined             | Undefined                  | 0.41772        | <b>-0.70035</b> | 0.11838        | 5.573E-03 |
| 138.0317 | 5.04  | C7H6O3      | Sesamol                                           | 7 | Undefined             | Undefined                  | -0.69245       | <b>-2.2051</b>  | -0.71272       | 6.232E-   |



|          |       |           |                                                |   |           |                                                                               |          |          |                |           |
|----------|-------|-----------|------------------------------------------------|---|-----------|-------------------------------------------------------------------------------|----------|----------|----------------|-----------|
|          |       |           |                                                |   |           |                                                                               |          |          |                | 03        |
| 716.5143 | 3.65  | C43H73O6P | 2,3-Bis-O-(geranylgeranyl)glycerol 1-phosphate | 6 | Undefined | Undefined                                                                     | 0.62384  | 0.046334 | <b>0.80838</b> | 5.623E-02 |
| 102.0681 | 6.73  | C5H10O2   | Ethylmethylaceticacid                          | 7 | Undefined | isoleucine biosynthesis V;epoxypseudoisoeugenol-2-methylbutyrate biosynthesis | 0.61402  | 0.37385  | <b>0.67823</b> | 5.882E-02 |
| 215.1886 | 6.69  | C12H25NO2 | Heptanoylcholine                               | 7 | Undefined | Undefined                                                                     | 1.0943   | 1.0439   | <b>0.95255</b> | 6.557E-02 |
| 241.2770 | 11.85 | C16H35N   | Hexadecylamin                                  | 7 | Undefined | Undefined                                                                     | 0.75812  | 0.15706  | <b>0.76861</b> | 9.858E-03 |
| 285.1730 | 6.07  | C18H23NO2 | Isococculidine                                 | 7 | Undefined | Undefined                                                                     | 0.4595   | 0.31762  | <b>0.63449</b> | 8.858E-02 |
| 229.1678 | 5.04  | C12H23NO3 | N-Decanoylglycine                              | 6 | Undefined | Undefined                                                                     | -0.55201 | 0.41797  | <b>0.78051</b> | 7.932E-02 |
| 309.3035 | 4.27  | C20H39NO  | N-Hexadecanoylpyrrolidine                      | 7 | Undefined | Undefined                                                                     | 0.1572   | 0.03189  | <b>1.9085</b>  | 8.140E-02 |
| 215.1521 | 5.24  | C11H21NO3 | N-Nonanoylglycine                              | 7 | Undefined | Undefined                                                                     | -0.67396 | -0.52231 | <b>0.77007</b> | 9.358E-03 |

**Supplementary Figure S1.** PCA score plots of all metabolites of (A) *P. aeruginosa* FADDI-PA111 & (B) LESB58 treated with polymyxin B and amikacin alone and in combination. Nineteen PBQCs were analysed throughout the LC-MS batch. Each dataset represents four biological replicates of antibiotic-treated and untreated control samples of all the time points. Pooled biological quality controls = PBQCs.

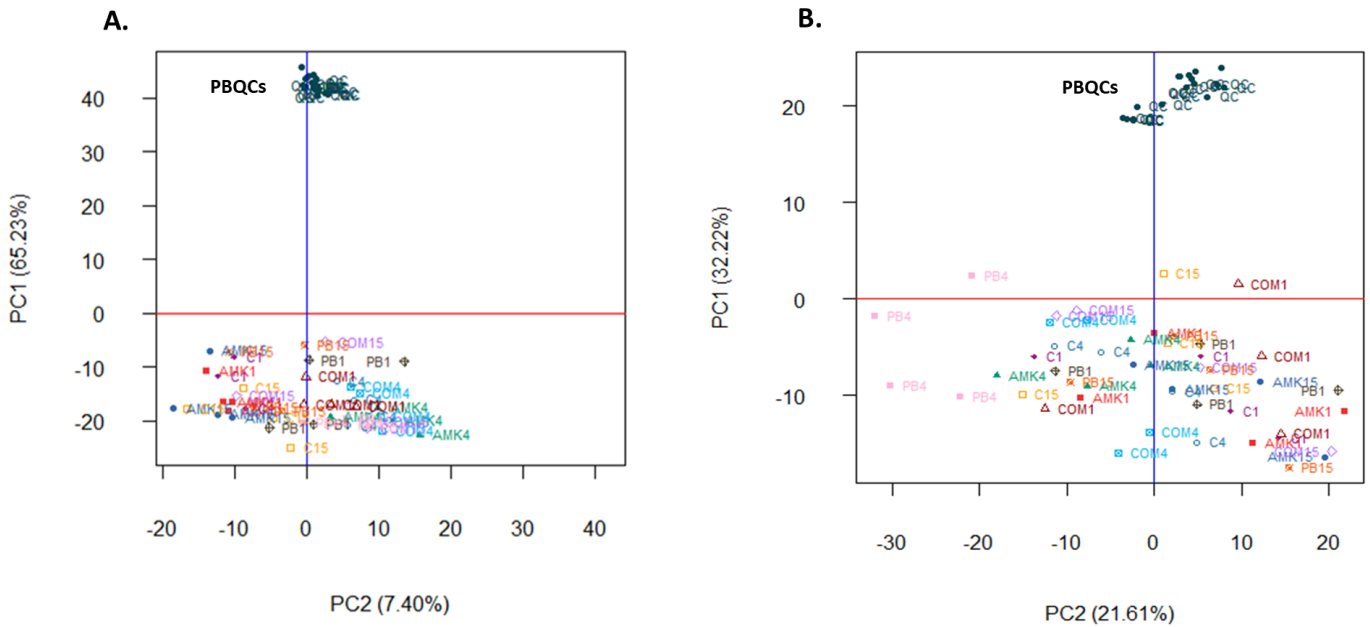

**Supplementary Figure S2.** Multivariate analyses of global metabolic changes. PLSDA score plots for metabolite levels of (A) FADDI-PA111 and (B) LESB58 samples treated with polymyxin B, amikacin and the combination at 15 min, 1 h, and 4 h. Each data set represents a total of 16 samples of 4 biological replicates of each condition. Green = untreated control (C); Cyan = polymyxin B alone (PMB); Red = amikacin (AMK); Purple = polymyxin B and amikacin combination (COM).

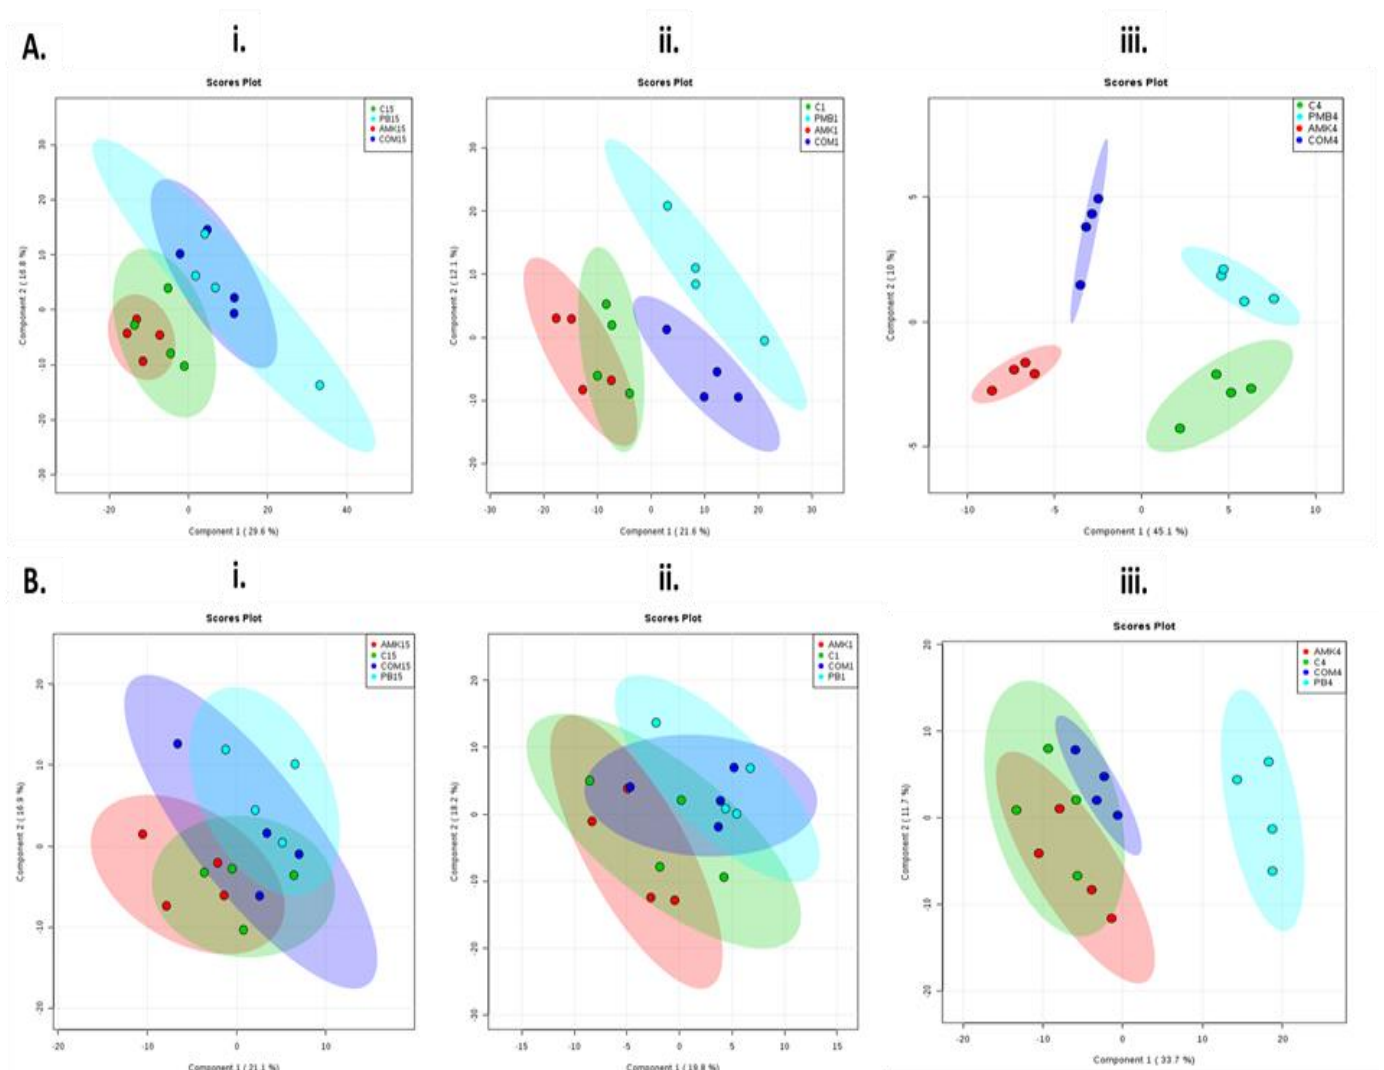

**Supplementary Figure S3.** Monotherapy and combination (COM) of polymyxin B (PMB) and amikacin (AMK) induce global metabolic changes. Heatmap profiles of all identified metabolites after treatment of (A) *P. aeruginosa* FADDI-PA111 and (B) LESB58 with single and combination of polymyxin B and amikacin at 15 min, 1 h, and 4 h.

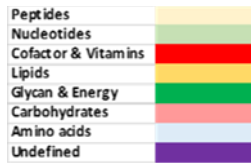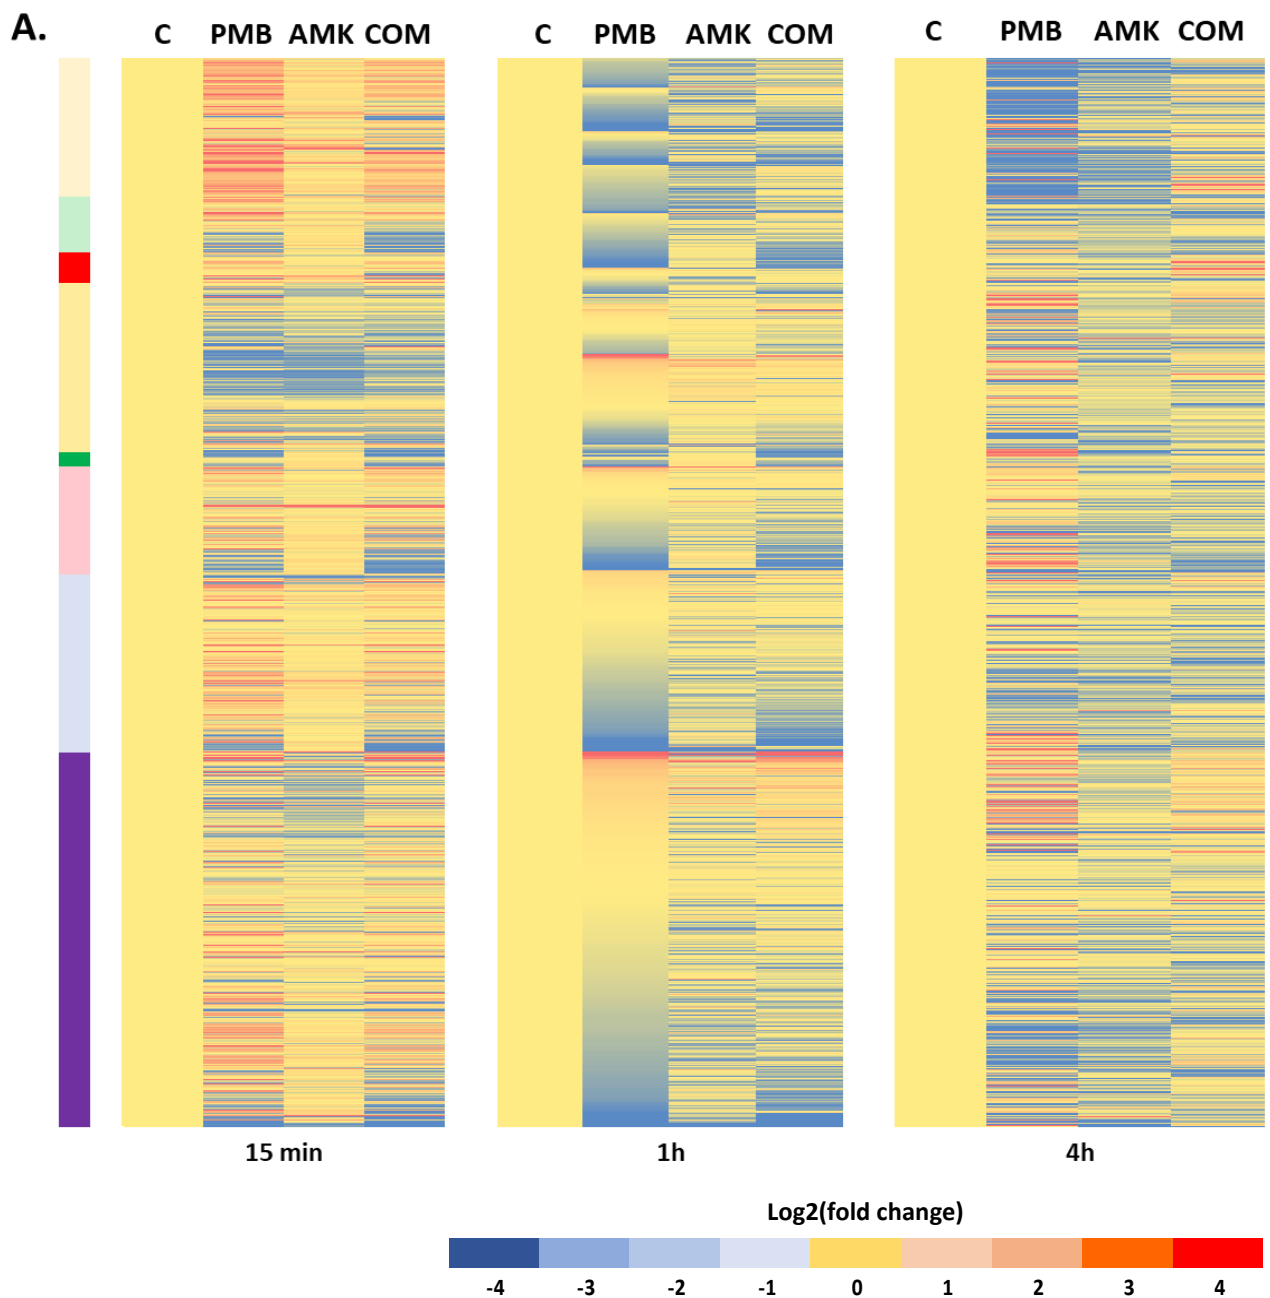

**B.**

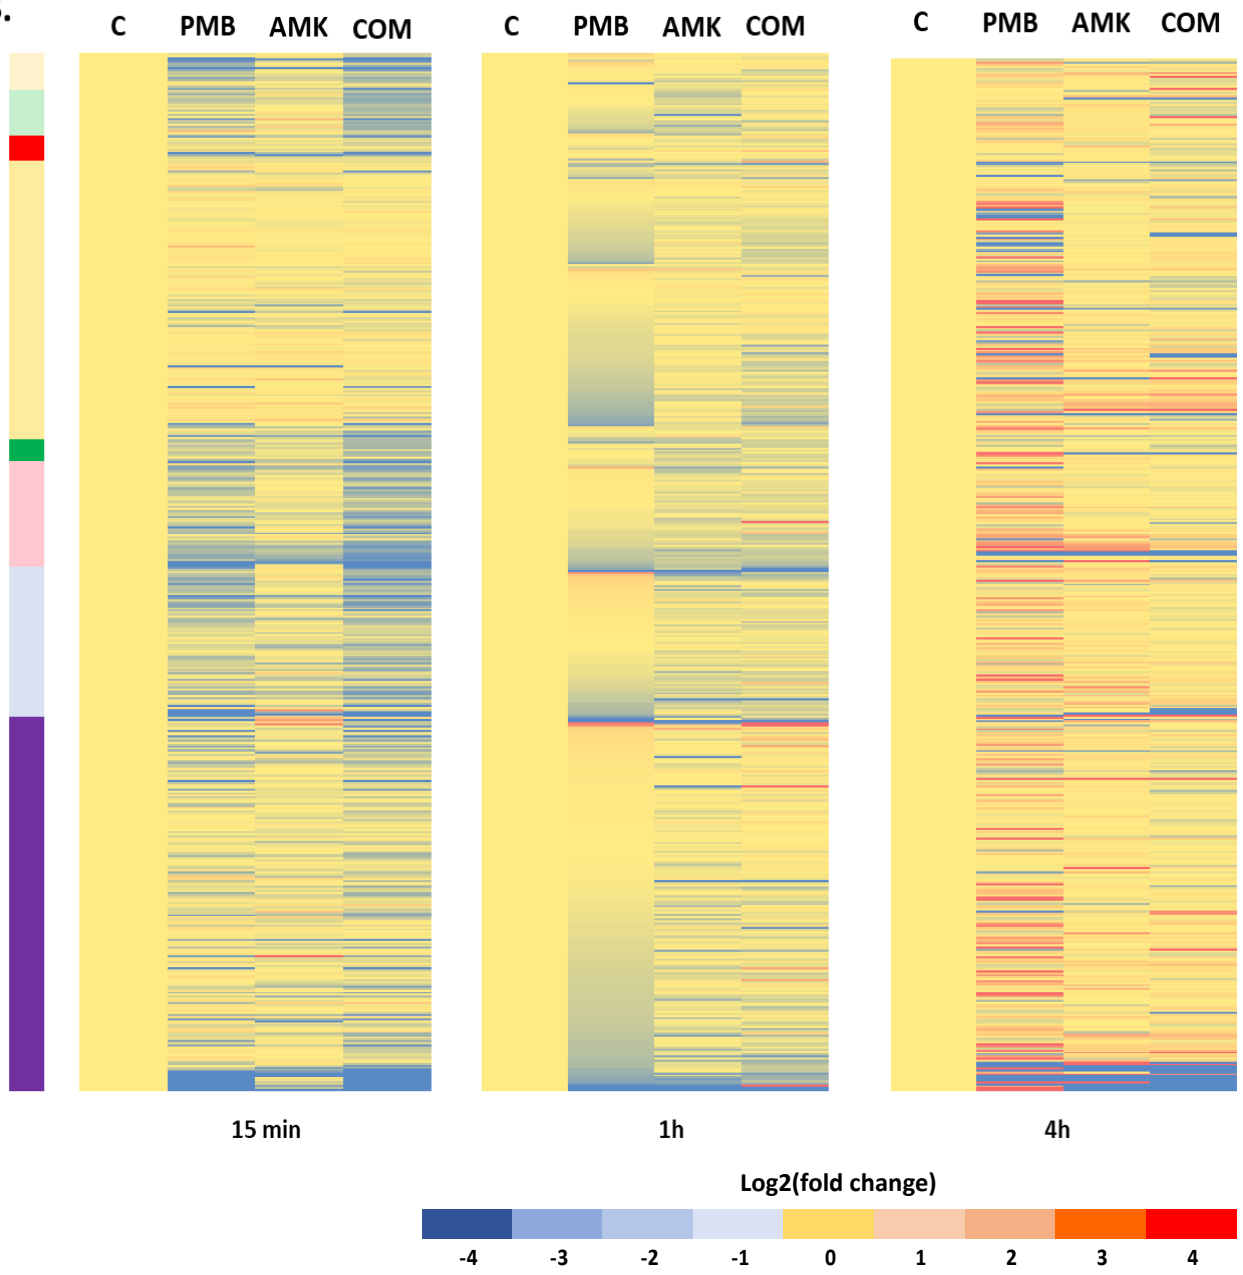

**Supplementary Figure S4.** Summary number of significant metabolites changes after antibiotic monotherapy and combination (COM) treatment of **(A)** FADDI-PA111 **(B)** LESB58 at 15 min, 1 h and 4 h. Changes ( $\geq 0.59$ -log<sub>2</sub>-fold,  $p \leq 0.05$ ; FDR  $\leq 0.1$ ).

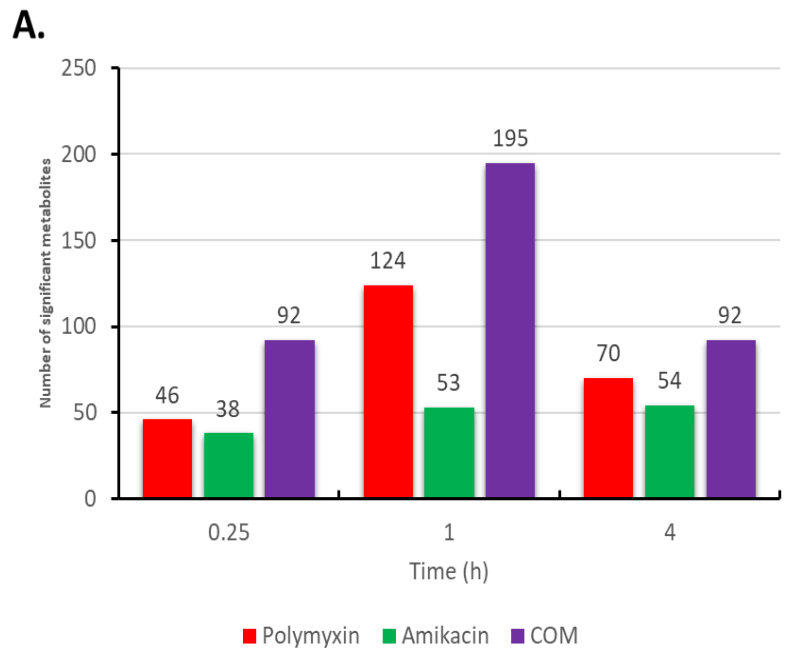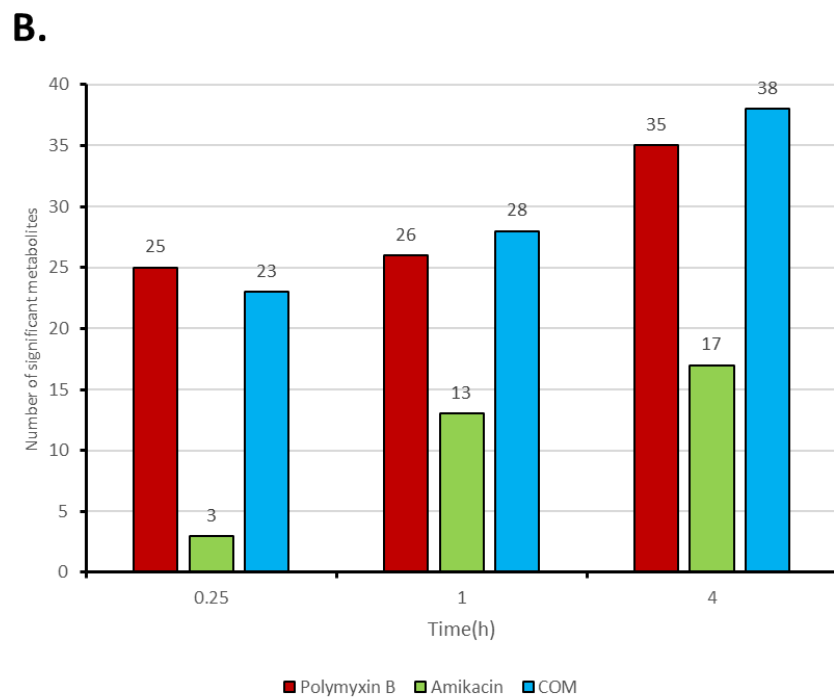

**Supplementary Figure S5.** Venn diagrams represent the number of metabolites significantly affected by each treatment for **(A) FADDI-PA111** and **(B) LESB58** at (i) 15 min, (ii) 1 h, and (iii) 4 h. Significant metabolites were selected with ( $\geq 0.58553$ -log<sub>2</sub>-fold,  $p \leq 0.05$ ; FDR  $\leq 0.1$ ).

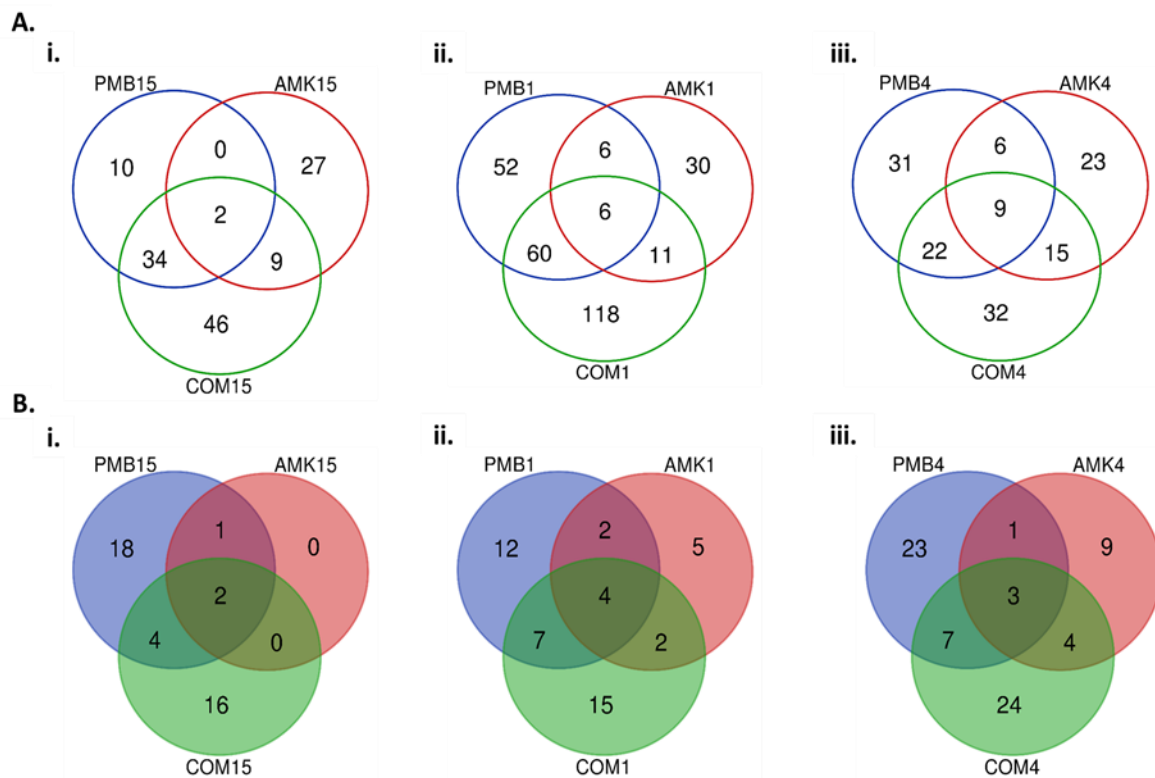

**Supplementary Figure S6.** Summary number of significantly changed metabolites classified according to different metabolite classes after antibiotic treatment of (A) FADDI-PA111 & (B) LESB58 at 15 min, 1 h, and 4 h. (Changes > 1.0-log<sub>2</sub>-fold,  $p \leq 0.05$ ; FDR  $\leq 0.1$  for FADDI-PA111; ( $\geq 0.59$ -log<sub>2</sub>-fold,  $p \leq 0.05$ ; FDR  $\leq 0.1$ ) for LESB58.

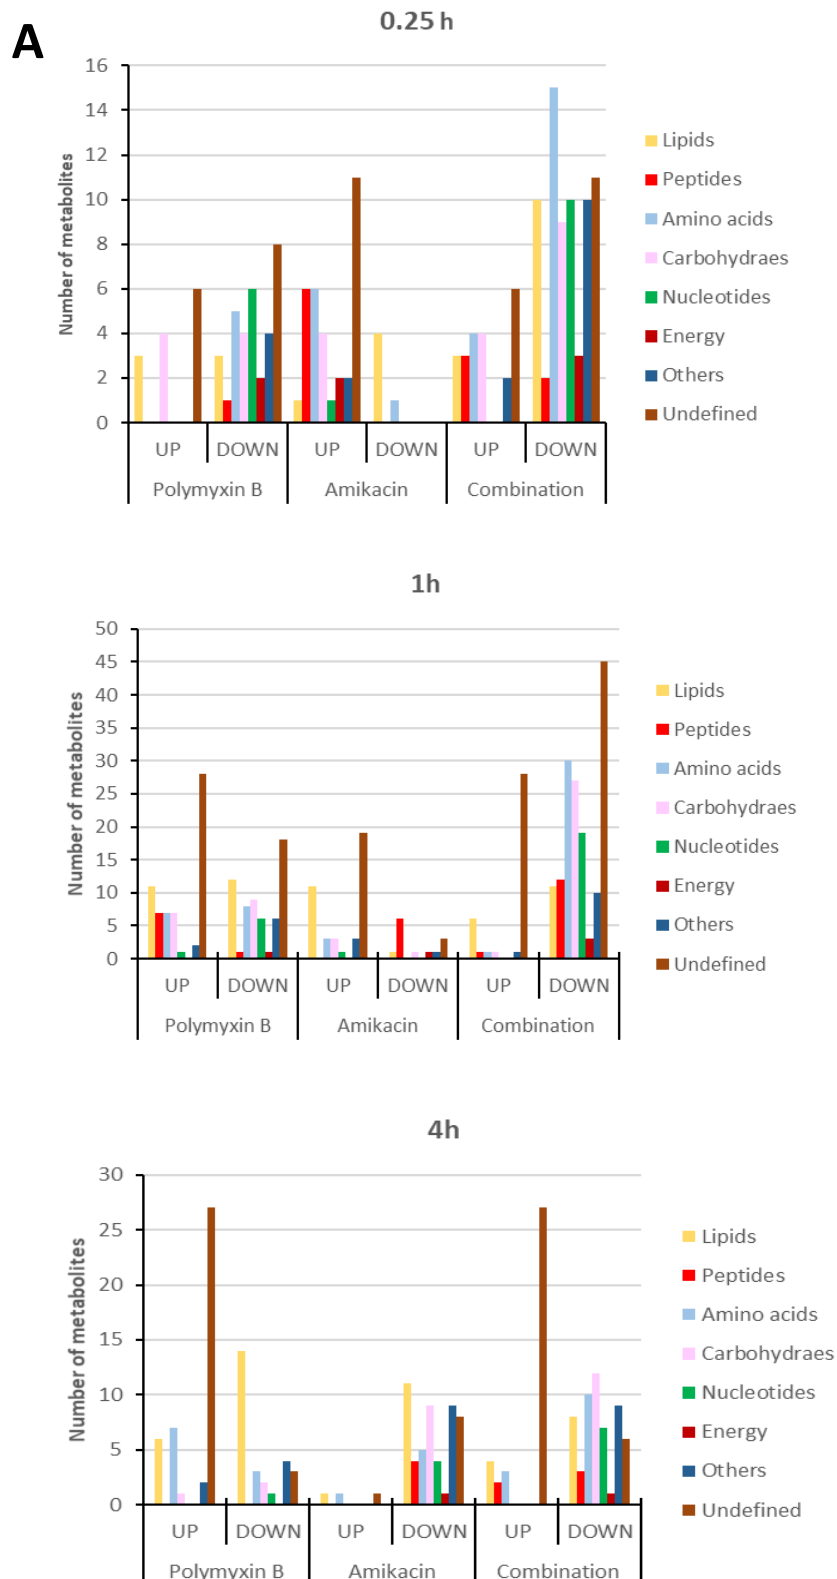



**B.**

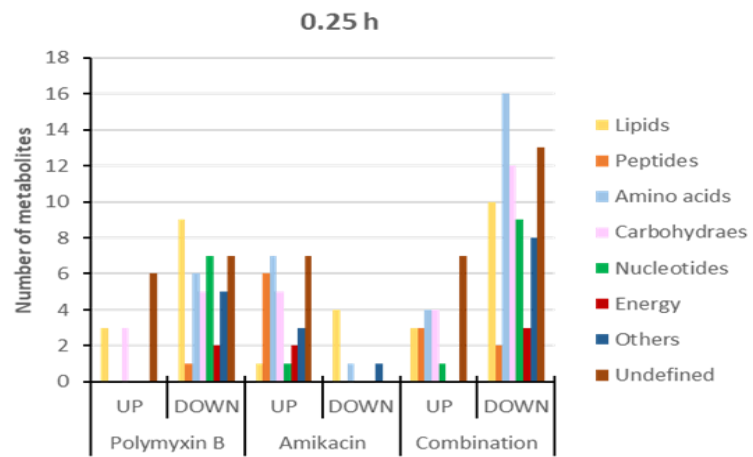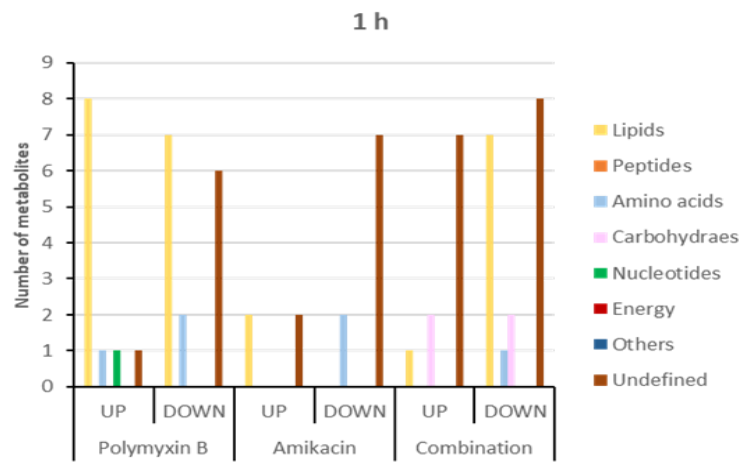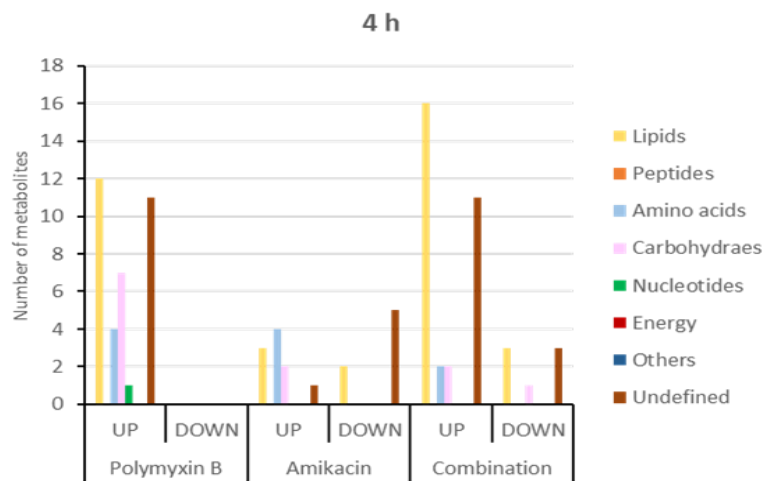

**Supplementary Figure S7.** Time-kill kinetics of polymyxin B and amikacin alone and in combination against *P. aeruginosa* FADDI-P111 (A) and LESB58 (B).

**A.**

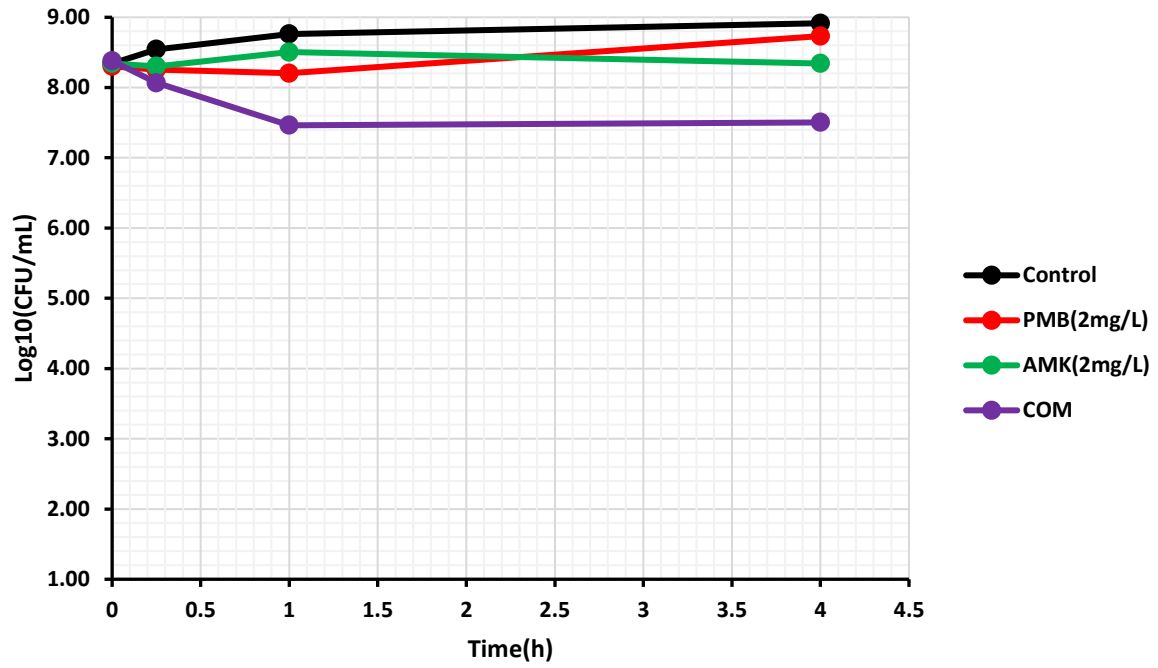

**B.**

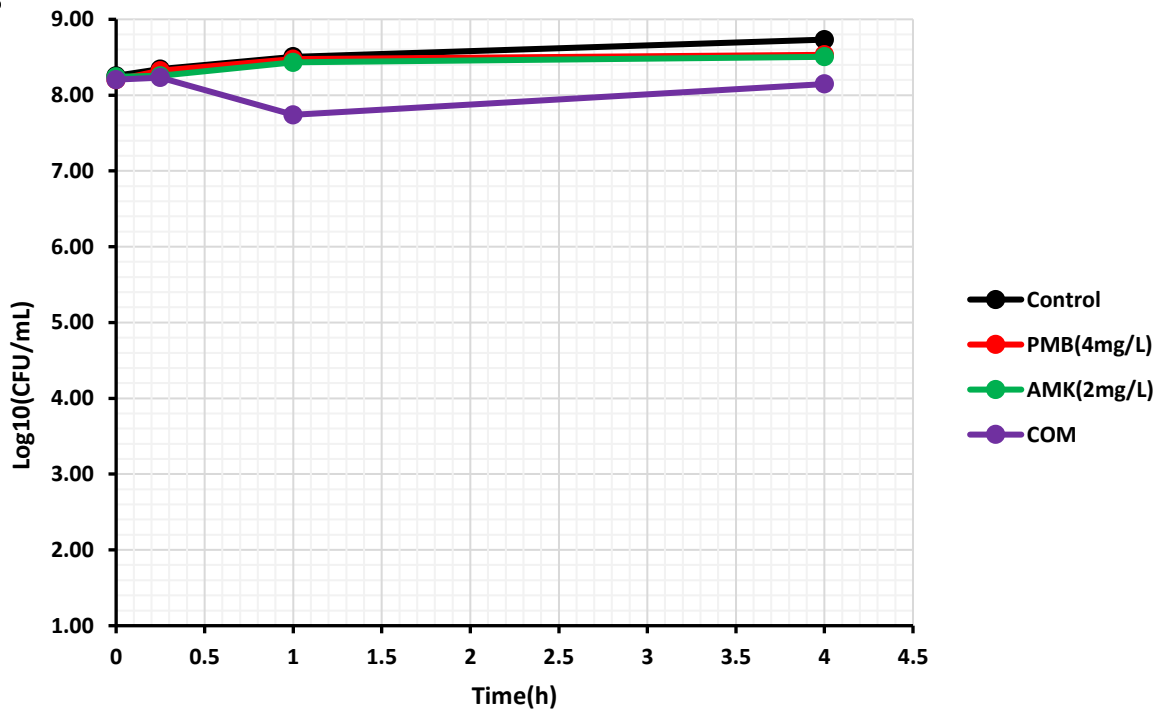

## References

1. Kirwan JA, Weber RJ, Broadhurst DI et al. Direct infusion mass spectrometry metabolomics dataset: a benchmark for data processing and quality control. *Sci Data* 2014; **1**: 140012.
